# Supplementary material for: Heart rate recovery and morbidity after noncardiac surgery: Planned secondary analysis of two prospective, multi-centre, blinded observational studies
Source: PLoS One. 2019 Aug 21;14(8):e0221277. doi: 10.1371/journal.pone.0221277 (PMC6703687; doi:10.1371/journal.pone.0221277)
Supplement: S1 File — (XLSX) [file pone.0221277.s001.xlsx]

## Sheet: Sheet1
HRR1	AGE	POMSday5	POMSday3	Resting HR	Study
10	85	0	1	77	POMHR
17	62	1	1	66	POMHR
33	78	0	1	103	POMHR
10	75	0	1	55	POMHR
8	79	0	1	62	POMHR
14	39	0	1	90	POMHR
16	74	0	1	91	POMHR
10	88	0	1	61	POMHR
20	59	1	1	100	POMHR
19	73	0	1	88	POMHR
14	79	0	0	80	POMHR
8	84	0	1	88	POMHR
10	84	0	1	99	POMHR
0	78	1	1	78	POMHR
5	76	1	1	76	POMHR
0	80	0	1	71	POMHR
4	79	1	1	80	POMHR
17	74	0	0	60	POMHR
11	59	1	1	126	POMHR
12	65	1	1	74	POMHR
9	66	0	1	90	POMHR
16	75	0	1	53	POMHR
13	74	0	1	75	POMHR
27	81	0	0	105	POMHR
10	78	0	1	50	POMHR
7	73	0	1	81	POMHR
12	61	0	1	80	POMHR
19	69	1	1	69	POMHR
49	63	0	1	90	POMHR
9	55	1	1	94	POMHR
7	81	0	1	67	POMHR
32	82	1	1	66	POMHR
15	70	1	1	61	POMHR
8	82	1	1	53	POMHR
21	75	1	1	65	POMHR
12	76	1	1	69	POMHR
9	73	1	1	86	POMHR
19	79	0	1	82	POMHR
-1	79	1	1	76	POMHR
35	32	0	1	69	POMHR
5	63	1	1	79	POMHR
21	80	1	1	66	POMHR
12	75	0	1	88	POMHR
26	49	1	1	68	POMHR
8	76	1	1	59	POMHR
15	75	0	1	75	POMHR
6	60	1	1	68	POMHR
6	73	0	1	69	POMHR
6	73	0	1	66	POMHR
13	66	0	1	87	POMHR
15	69	1	1	67	POMHR
18	81	0	1	69	POMHR
4	87	1	1	85	POMHR
17	52	1	1	68	POMHR
9	73	1	1	93	POMHR
10	84	0	0	51	POMHR
9	70	1	1	72	POMHR
8	79	0	0	52	POMHR
19	61	1	1	94	POMHR
9	70	0	0	64	POMHR
11	76	1	1	72	POMHR
26	73	0	1	55	POMHR
35	80	0	1	80	POMHR
11	33	1	1	85	POMHR
7	71	1	1	71	POMHR
13	73	1	1	96	POMHR
3	91	0	1	76	POMHR
27	63	1	1	44	POMHR
-4	58	1	1	74	POMHR
19	75	0	1	83	POMHR
8	77	0	1	95	POMHR
17	72	0	1	88	POMHR
19	78	0	0	65	POMHR
13	70	1	1	75	POMHR
31	80	0	1	99	POMHR
23	64	1	1	64	POMHR
15	65	1	1	72	POMHR
13	54	1	1	56	POMHR
15	81	1	1	80	POMHR
15	53	1	1	86	POMHR
23	79	0	1	52	POMHR
40	78	1	1	93	POMHR
18	70	1	1	67	POMHR
7	69	0	1	99	POMHR
2	81	1	1	74	POMHR
8	80	1	1	80	POMHR
7	72	1	1	75	POMHR
11	69	0	0	77	POMHR
8	79	0	1	98	POMHR
20	50	1	1	84	POMHR
13	89	0	1	61	POMHR
-1	81	0	1	94	POMHR
22	66	0	1	79	POMHR
19	70	0	1	57	POMHR
19	81	1	1	74	POMHR
-2	72	1	1	56	POMHR
36	43	0	1	85	POMHR
0	82	0	1	57	POMHR
14	76	1	1	55	POMHR
21	80	1	1	64	POMHR
4	56	1	1	71	POMHR
-15	68	1	1	75	POMHR
20	66	1	1	61	POMHR
9	64	1	1	81	POMHR
32	62	0	1	51	POMHR
11	77	1	1	96	POMHR
11	59	1	1	86	POMHR
14	79	1	1	79	POMHR
10	72	0	1	59	POMHR
15	76	0	1	99	POMHR
28	76	0	1	78	POMHR
14	52	1	1	92	POMHR
29	72	0	1	61	POMHR
12	77	1	1	102	POMHR
27	65	1	1	72	POMHR
19	56	1	1	93	POMHR
19	76	1	1	76	POMHR
21	62	1	1	63	POMHR
20	62	1	1	77	POMHR
31	66	0	1	89	POMHR
8	66	0	1	89	POMHR
2	76	1	1	96	POMHR
13	75	0	1	76	POMHR
15	64	1	1	113	POMHR
20	51	1	1	84	POMHR
26	72	0	1	67	POMHR
19	77	0	0	76	POMHR
8	69	0	1	109	POMHR
33	72	1	1	81	POMHR
26	66	0	0	75	POMHR
5	61	0	1	97	POMHR
19	82	0	1	61	POMHR
3	54	1	1	86	POMHR
18	53	0	1	68	POMHR
17	64	1	1	92	POMHR
19	68	0	1	68	POMHR
11	84	1	1	73	POMHR
4	83	1	1	92	POMHR
-1	74	0	1	78	POMHR
0	70	0	1	87	POMHR
13	67	0	1	90	POMHR
26	62	1	1	69	POMHR
12	73	0	1	78	POMHR
31	47	1	1	79	POMHR
30	78	0	1	70	POMHR
17	79	0	1	90	POMHR
5	71	0	1	84	POMHR
15	55	1	1	110	POMHR
26	63	1	1	70	POMHR
25	66	1	1	72	POMHR
23	75	0	1	74	POMHR
10	71	1	1	73	POMHR
0	76	0	1	66	POMHR
18	66	0	1	116	POMHR
5	73	0	1	73	POMHR
14	77	0	1	60	POMHR
14	75	0	1	105	POMHR
41	75	1	1	83	POMHR
14	71	1	1	74	POMHR
8	67	1	1	84	POMHR
39	68	1	1	60	POMHR
21	78	0	1	73	POMHR
4	65	0	1	72	POMHR
16	77	0	1	92	POMHR
2	64	0	1	95	POMHR
19	76	0	1	65	POMHR
18	73	0	1	96	POMHR
44	78	0	1	57	POMHR
10	74	0	1	76	POMHR
15	56	0	1	81	POMHR
28	73	1	1	101	POMHR
34	78	1	1	66	POMHR
5	74	1	1	80	POMHR
11	79	0	1	84	POMHR
11	80	0	1	68	POMHR
11	69	1	1	78	POMHR
-3	61	1	1	100	POMHR
5	70	0	1	111	POMHR
9	67	1	1	86	POMHR
44	78	1	1	66	POMHR
17	59	1	1	51	POMHR
-18	66	0	1	63	POMHR
40	72	0	0	61	POMHR
13	60	0	1	78	POMHR
18	69	0	1	47	POMHR
2	85	1	1	79	POMHR
10	67	0	1	90	POMHR
13	81	0	1	113	POMHR
8	61	1	1	89	POMHR
-2	78	0	1	104	POMHR
22	54	1	1	72	POMHR
28	62	0	1	58	POMHR
2	73	0	1	82	POMHR
9	67	0	1	95	POMHR
70	83	1	1	67	POMHR
8	55	0	1	66	POMHR
13	66	1	1	57	POMHR
33	83	0	1	68	POMHR
16	83	0	1	72	POMHR
18	61	1	1	94	POMHR
20	54	1	1	70	POMHR
31	57	0	1	77	POMHR
40	20	0	1	74	POMHR
7	74	1	1	38	POMHR
9	71	0	1	46	POMHR
14	49	0	1	97	POMHR
14	76	0	1	69	POMHR
22	34	0	1	71	POMHR
10	76	0	0	88	POMHR
20	72	0	1	60	POMHR
57	71	1	1	47	POMHR
14	73	0	1	64	POMHR
13	84	1	1	101	POMHR
16	64	1	1	83	POMHR
14	67	0	1	93	POMHR
22	63	0	1	85	POMHR
22	66	0	1	71	POMHR
34	70	0	1	53	POMHR
8	67	1	1	96	POMHR
4	56	0	1	73	POMHR
15	67	0	0	75	POMHR
4	57	0	1	66	POMHR
2	65	0	1	113	POMHR
19	58	0	1	75	POMHR
9	75	1	1	78	POMHR
10	60	0	1	83	POMHR
-15	70	1	1	102	POMHR
3	70	0	1	74	POMHR
8	72	0	1	67	POMHR
39	51	1	1	69	POMHR
9	72	1	1	57	POMHR
11	56	0	1	69	POMHR
-2	80	1	1	87	POMHR
10	62	1	1	78	POMHR
14	71	1	1	87	POMHR
24	67	1	1	89	POMHR
6	83	0	1	87	POMHR
6	77	1	1	123	POMHR
3	76	1	1	112	POMHR
25	73	0	1	82	POMHR
2	65	0	1	83	POMHR
22	57	1	1	76	POMHR
5	81	0	1	138	POMHR
19	61	0	1	100	POMHR
31	65	1	1	70	POMHR
38	47	0	1	72	POMHR
40	58	0	1	67	POMHR
6	76	0	0	107	POMHR
11	68	0	1	68	POMHR
15	71	0	1	71	POMHR
8	60	1	1	80	POMHR
22	80	1	1	79	POMHR
30	55	0	1	64	POMHR
20	63	1	1	76	POMHR
18	65	0	0	72	POMHR
4	79	0	1	84	POMHR
4	84	0	1	98	POMHR
19	71	0	1	64	POMHR
20	72	0	0	70	POMHR
18	56	1	1	99	POMHR
14	63	1	1	101	POMHR
11	69	1	1	85	POMHR
15	72	1	1	104	POMHR
10	22	0	1	107	POMHR
44	78	1	1	133	POMHR
19	53	0	1	84	POMHR
19	74	1	1	55	POMHR
9	65	1	1	97	POMHR
13	62	0	1	99	POMHR
14	45	0	1	76	POMHR
7	83	0	1	95	POMHR
20	58	0	1	58	POMHR
4	66	0	1	85	POMHR
6	67	0	1	69	POMHR
2	69	1	1	60	POMHR
42	77	0	1	63	POMHR
2	72	0	0	67	POMHR
7	80	0	1	71	POMHR
15	69	1	1	85	POMHR
2	52	1	1	75	POMHR
9	64	1	1	81	POMHR
33	78	1	1	69	POMHR
12	65	1	1	74	POMHR
10	57	0	1	99	POMHR
6	55	1	1	103	POMHR
22	70	0	1	83	POMHR
12	56	1	1	57	POMHR
31	64	1	1	66	POMHR
17	77	0	1	74	POMHR
3	67	0	1	67	POMHR
-12	80	1	1	105	POMHR
37	51	1	1	92	POMHR
30	70	0	1	84	POMHR
8	74	1	1	115	POMHR
11	65	0	1	95	POMHR
19	57	1	1	58	POMHR
9	58	0	1	96	POMHR
12	64	1	1	102	POMHR
30	60	0	1	58	POMHR
23	63	1	1	59	POMHR
23	83	0	1	98	POMHR
10	74	1	1	111	POMHR
23	56	1	1	72	POMHR
25	51	0	1	74	POMHR
7	73	1	1	107	POMHR
11	79	1	1	87	POMHR
25	67	0	1	106	POMHR
11	86	1	1	88	POMHR
11	89	1	1	108	POMHR
23	54	1	1	56	POMHR
20	49	0	1	86	POMHR
15	58	0	1	86	POMHR
12	74	1	1	63	POMHR
14	49	0	1	89	POMHR
3	59	1	1	96	POMHR
5	72	0	1	78	POMHR
25	70	0	1	60	POMHR
13	52	1	1	95	POMHR
30	64	0	1	61	POMHR
18	71	1	1	74	POMHR
0	24	1	1	54	POMHR
6	65	0	1	81	POMHR
0	83	0	1	96	POMHR
10	76	1	1	72	POMHR
12	68	0	1	106	POMHR
17	70	0	1	72	POMHR
8	74	0	0	100	POMHR
5	69	0	1	97	POMHR
18	58	0	1	78	POMHR
17	75	0	0	107	POMHR
7	63	0	1	118	POMHR
10	69	0	1	100	POMHR
8	73	1	1	124	POMHR
21	80	1	1	73	POMHR
13	48	1	1	98	POMHR
6	71	0	1	116	POMHR
17	59	0	1	87	POMHR
8	69	1	1	100	POMHR
24	77	1	1	108	POMHR
7	73	1	1	73	POMHR
12	71	0	1	122	POMHR
19	68	0	1	82	POMHR
12	58	1	1	101	POMHR
3	77	1	1	97	POMHR
8	76	1	1	95	POMHR
21	70	1	1	74	POMHR
12	67	1	1	69	POMHR
21	47	1	1	126	POMHR
19	69	1	1	75	POMHR
15	67	0	1	91	POMHR
6	67	1	1	113	POMHR
4	47	1	1	97	POMHR
6	68	1	1	71	POMHR
21	52	1	1	79	POMHR
17	44	0	0	101	POMHR
18	79	0	1	71	POMHR
15	69	0	1	83	POMHR
21	53	0	1	89	POMHR
24	74	0	1	92	POMHR
9	65	1	1	90	POMHR
13	79	0	0	88	POMHR
12	76	0	0	96	POMHR
15	59	1	1	61	POMHR
23	69	1	1	73	POMHR
10	83	0	1	98	POMHR
8	63	1	1	82	POMHR
12	66	0	1	64	POMHR
6	66	1	1	83	POMHR
0	77	0	1	108	POMHR
19	59	1	1	89	POMHR
22	87	0	1	71	POMHR
15	83	1	1	66	POMHR
13	52	1	1	88	POMHR
15	58	1	1	97	POMHR
28	64	1	1	90	POMHR
8	76	0	1	75	POMHR
14	45	0	1	124	POMHR
13	65	0	0	78	POMHR
20	63	1	1	68	POMHR
12	72	1	1	92	POMHR
19	67	1	1	68	POMHR
18	73	1	1	71	POMHR
10	57	0	1	88	POMHR
29	55	0	1	82	POMHR
13	76	1	1	66	POMHR
24	64	1	1	115	POMHR
3	67	1	1	87	POMHR
28	81	1	1	78	POMHR
3	83	0	0	76	POMHR
16	54	1	0	85	POMHR
4	84	1	1	83	POMHR
19	55	1	1	95	POMHR
8	81	0	1	116	POMHR
28	70	1	1	62	POMHR
11	87	0	0	92	POMHR
10	56	1	1	94	POMHR
23	77	0	1	80	POMHR
18	68	1	1	54	POMHR
3	79	0	1	114	POMHR
5	71	1	1	99	POMHR
27	70	0	1	54	POMHR
6	75	0	1	67	POMHR
2	71	1	1	93	POMHR
9	54	1	1	84	POMHR
28	71	1	1	92	POMHR
17	74	1	1	85	POMHR
11	75	0	1	104	POMHR
21	62	0	1	70	POMHR
33	80	0	1	89	POMHR
1	72	0	1	84	POMHR
11	71	1	1	71	POMHR
23	69	1	1	74	POMHR
1	66	1	1	102	POMHR
17	67	1	1	90	POMHR
7	63	0	1	89	POMHR
9	73	0	1	67	POMHR
5	52	0	1	79	POMHR
-1	64	1	1	85	POMHR
22	69	1	1	70	POMHR
0	48	0	0	97	METS
33	54	0	1	71	METS
2	58	0	0	93	METS
19	73	0	1	94	METS
14	71	0	1	76	METS
5	68	1	1	80	METS
26	71	0	1	75	METS
16	57	0	1	94	METS
6	72	0	1	77	METS
21	45	0	1	74	METS
13	80	0	1	89	METS
19	40	0	0	83	METS
11	59	0	1	79	METS
8	60	0	1	83	METS
5	73	0	1	56	METS
12	65	0	1	82	METS
20	48	0	0	74	METS
-5	75	0	0	62	METS
20	59	0	1	68	METS
28	71	0	1	59	METS
7	69	0	0	91	METS
15	67	0	1	68	METS
32	71	0	1	65	METS
25	71	0	1	83	METS
26	73	0	1	96	METS
33	81	0	0	73	METS
27	67	0	1	82	METS
-3	52	0	0	91	METS
24	58	0	0	75	METS
28	73	0	0	69	METS
-16	54	0	0	59	METS
19	78	0	0	106	METS
22	57	0	0	68	METS
7	64	0	1	94	METS
8	66	0	0	70	METS
23	46	0	1	65	METS
24	57	0	1	79	METS
15	82	0	1	73	METS
28	46	0	1	77	METS
20	76	0	0	60	METS
1	69	0	0	63	METS
3	82	0	1	78	METS
23	63	0	0	67	METS
12	46	0	1	87	METS
7	77	0	1	90	METS
10	65	0	0	89	METS
3	59	0	0	62	METS
4	51	0	0	83	METS
35	70	0	0	78	METS
21	40	0	0	82	METS
20	63	0	0	63	METS
18	61	0	0	65	METS
11	64	0	0	88	METS
31	78	0	0	64	METS
34	45	0	0	77	METS
20	72	0	0	96	METS
13	42	0	1	76	METS
9	73	0	0	67	METS
1	71	0	0	69	METS
10	56	0	1	125	METS
16	69	0	0	75	METS
17	40	0	1	102	METS
5	59	0	1	98	METS
37	49	0	0	80	METS
33	78	0	0	90	METS
22	44	0	0	73	METS
22	54	0	1	83	METS
35	62	0	0	70	METS
19	43	0	0	72	METS
13	63	0	0	67	METS
22	58	0	1	64	METS
3	71	0	1	76	METS
15	78	0	1	86	METS
-5	65	0	1	103	METS
22	64	0	0	80	METS
26	70	0	1	66	METS
12	51	0	0	95	METS
18	65	1	1	93	METS
18	78	0	0	69	METS
53	82	0	0	85	METS
18	73	0	0	57	METS
8	83	0	0	71	METS
10	85	0	0	78	METS
15	75	0	0	77	METS
6	87	0	0	66	METS
28	54	0	0	76	METS
17	70	0	0	77	METS
11	69	0	0	96	METS
22	70	0	0	75	METS
4	73	0	1	72	METS
17	70	0	0	80	METS
26	72	0	1	89	METS
11	72	0	0	66	METS
20	70	0	0	69	METS
18	48	0	0	72	METS
23	69	0	0	77	METS
24	75	0	0	63	METS
35	72	0	0	58	METS
17	70	0	0	80	METS
23	46	0	0	81	METS
26	67	0	0	83	METS
9	55	0	0	71	METS
28	70	0	0	59	METS
11	85	0	0	63	METS
21	72	0	1	82	METS
25	67	0	0	60	METS
4	77	0	0	86	METS
18	73	0	0	52	METS
13	70	0	0	63	METS
16	77	0	0	64	METS
10	53	0	0	70	METS
28	71	0	0	84	METS
29	70	0	0	57	METS
22	61	0	0	65	METS
10	76	0	1	80	METS
11	84	0	0	80	METS
-6	64	0	1	84	METS
3	76	0	0	78	METS
10	66	0	0	60	METS
7	73	0	0	56	METS
20	63	0	0	72	METS
3	54	0	0	89	METS
13	69	0	0	72	METS
11	81	0	0	87	METS
19	72	0	0	76	METS
8	71	1	1	60	METS
14	70	0	0	78	METS
13	74	0	1	56	METS
19	71	0	0	64	METS
16	70	0	0	65	METS
19	68	0	0	81	METS
23	70	0	0	75	METS
6	75	0	0	63	METS
3	78	0	0	76	METS
14	70	0	0	79	METS
34	69	0	0	79	METS
10	67	0	0	85	METS
8	77	0	0	79	METS
2	61	0	0	81	METS
20	70	0	0	82	METS
-1	62	0	0	71	METS
5	65	0	0	82	METS
13	53	0	0	82	METS
19	70	0	0	100	METS
17	75	0	0	61	METS
15	43	0	0	85	METS
4	81	0	1	78	METS
13	43	0	0	103	METS
15	70	0	0	79	METS
32	65	0	0	63	METS
18	77	0	0	61	METS
14	74	0	0	50	METS
8	74	0	1	83	METS
17	67	0	0	75	METS
14	75	0	0	66	METS
12	87	0	0	77	METS
1	82	0	1	87	METS
-13	72	0	0	72	METS
25	70	0	0	71	METS
10	75	0	0	56	METS
4	75	0	0	79	METS
19	79	0	0	86	METS
14	75	0	0	70	METS
11	67	0	0	98	METS
23	70	0	0	80	METS
9	62	0	0	72	METS
10	79	0	0	64	METS
6	73	0	0	64	METS
26	75	0	0	48	METS
21	46	0	0	91	METS
11	68	0	0	94	METS
27	53	0	0	68	METS
21	50	0	0	87	METS
12	69	0	1	61	METS
46	40	0	0	93	METS
26	65	0	1	78	METS
36	64	0	1	82	METS
14	69	0	1	87	METS
19	54	0	0	88	METS
16	73	0	1	70	METS
18	63	0	1	77	METS
6	65	0	1	75	METS
21	67	0	1	78	METS
7	71	0	0	75	METS
19	58	0	0	84	METS
32	63	0	0	84	METS
-2	60	0	0	97	METS
17	62	0	1	76	METS
40	75	0	1	72	METS
15	57	0	0	79	METS
16	63	1	1	78	METS
29	58	0	0	86	METS
14	72	0	1	73	METS
15	73	0	1	57	METS
21	49	0	0	100	METS
28	41	0	1	76	METS
29	70	0	0	82	METS
33	67	0	1	63	METS
18	74	0	0	61	METS
30	71	0	1	71	METS
18	71	0	1	79	METS
27	46	0	0	70	METS
24	64	0	1	82	METS
18	53	0	1	90	METS
22	61	0	0	58	METS
-10	61	0	1	81	METS
26	65	0	0	79	METS
21	68	0	0	65	METS
16	66	0	0	68	METS
29	73	0	0	50	METS
-11	63	0	1	80	METS
6	80	0	1	88	METS
6	64	0	1	98	METS
-3	80	0	1	84	METS
6	77	0	0	62	METS
27	51	0	1	67	METS
26	48	0	0	97	METS
26	70	0	1	68	METS
32	69	0	0	56	METS
19	57	0	0	72	METS
11	74	0	0	77	METS
8	60	0	1	65	METS
13	83	0	0	55	METS
24	70	0	0	79	METS
10	66	0	0	53	METS
18	42	0	0	73	METS
19	55	0	1	64	METS
42	67	0	0	88	METS
6	70	0	1	76	METS
9	62	0	0	83	METS
17	70	0	0	61	METS
21	58	0	1	60	METS
2	73	0	0	88	METS
22	64	0	1	65	METS
13	63	0	1	71	METS
26	54	0	0	78	METS
8	69	0	0	87	METS
12	70	0	0	60	METS
33	47	0	0	77	METS
11	65	0	1	60	METS
22	65	0	0	81	METS
23	64	0	0	80	METS
8	73	0	0	90	METS
18	63	0	0	90	METS
19	59	1	1	80	METS
38	61	0	1	83	METS
10	65	0	0	67	METS
23	51	0	1	87	METS
17	57	0	0	87	METS
13	69	1	1	68	METS
26	64	0	0	61	METS
28	58	0	1	73	METS
-2	58	0	1	78	METS
12	57	0	0	67	METS
2	52	0	1	80	METS
5	71	0	1	64	METS
2	88	0	0	74	METS
22	61	0	0	61	METS
27	40	1	1	73	METS
6	62	0	0	80	METS
11	74	0	1	70	METS
15	53	0	0	83	METS
21	57	0	0	64	METS
30	60	0	0	78	METS
9	75	0	0	62	METS
19	52	1	1	95	METS
12	56	0	0	132	METS
14	54	0	1	84	METS
10	73	0	1	70	METS
23	48	0	0	105	METS
24	47	0	1	76	METS
16	61	0	0	94	METS
32	56	0	1	64	METS
25	66	0	0	51	METS
32	47	0	0	89	METS
23	62	0	0	93	METS
-1	68	1	1	96	METS
19	43	0	1	88	METS
3	79	0	0	73	METS
54	86	0	0	67	METS
34	65	0	1	62	METS
2	57	0	0	105	METS
11	70	0	0	88	METS
23	44	0	0	79	METS
13	52	0	1	98	METS
20	62	1	1	64	METS
13	47	1	1	100	METS
5	50	1	1	108	METS
18	74	0	0	65	METS
9	64	0	0	78	METS
8	70	0	1	72	METS
10	79	1	1	77	METS
16	73	0	0	73	METS
-3	74	0	0	40	METS
25	44	1	1	70	METS
-3	56	0	1	69	METS
19	63	0	0	70	METS
-4	73	0	1	65	METS
39	63	0	0	76	METS
12	75	0	1	57	METS
11	65	0	0	93	METS
13	63	0	0	64	METS
21	67	0	0	90	METS
17	60	0	1	66	METS
40	54	1	1	69	METS
32	49	0	0	81	METS
20	67	0	0	86	METS
22	70	0	0	63	METS
8	69	0	1	82	METS
20	54	0	0	65	METS
21	61	0	0	71	METS
17	69	0	0	64	METS
22	59	0	0	72	METS
19	64	0	0	61	METS
11	71	0	0	85	METS
9	55	1	1	94	METS
6	71	0	0	82	METS
9	54	0	1	90	METS
18	46	0	1	87	METS
22	58	0	0	87	METS
8	72	0	0	82	METS
16	73	1	1	100	METS
21	52	0	0	78	METS
40	66	0	1	82	METS
17	59	0	0	88	METS
7	63	1	1	126	METS
24	43	1	1	84	METS
21	41	0	0	55	METS
12	86	0	1	68	METS
16	41	0	1	85	METS
35	59	0	0	64	METS
14	49	0	1	90	METS
17	75	0	1	50	METS
44	68	0	1	84	METS
18	46	0	1	75	METS
17	71	0	1	73	METS
10	61	0	0	96	METS
9	78	0	1	82	METS
-1	77	1	1	84	METS
1	48	0	1	74	METS
9	59	1	1	86	METS
35	74	0	0	94	METS
20	71	0	0	85	METS
1	78	0	1	71	METS
33	53	0	1	72	METS
30	59	0	1	68	METS
10	61	0	1	90	METS
6	73	0	1	71	METS
17	53	1	1	84	METS
8	48	0	1	79	METS
11	67	0	1	87	METS
16	55	0	1	61	METS
27	45	0	1	99	METS
16	53	0	0	115	METS
3	65	0	1	70	METS
12	63	0	1	52	METS
27	61	0	1	73	METS
0	74	1	1	96	METS
-84	57	0	0	67	METS
11	54	1	1	88	METS
12	40	1	1	90	METS
7	71	0	0	72	METS
13	66	0	1	79	METS
16	58	0	1	81	METS
15	64	0	1	84	METS
42	56	0	1	68	METS
23	47	0	0	75	METS
15	78	0	1	88	METS
20	71	0	1	69	METS
10	47	0	1	92	METS
20	61	0	1	78	METS
13	57	0	1	91	METS
20	64	0	1	96	METS
15	48	0	1	84	METS
16	62	0	1	80	METS
6	75	1	1	102	METS
13	54	1	1	80	METS
3	71	0	0	57	METS
3	73	0	1	85	METS
19	78	0	1	57	METS
8	56	0	0	106	METS
0	69	0	1	65	METS
18	65	1	1	63	METS
7	54	0	1	110	METS
11	51	0	0	90	METS
12	63	0	1	88	METS
1	68	0	0	78	METS
7	74	0	0	81	METS
25	45	0	0	94	METS
-4	53	0	1	84	METS
9	45	1	1	95	METS
5	56	0	1	88	METS
-3	70	0	1	89	METS
17	50	1	1	75	METS
-6	56	0	1	72	METS
17	81	0	0	65	METS
-1	44	0	0	96	METS
13	65	0	1	67	METS
15	72	0	1	71	METS
21	43	1	1	90	METS
14	67	0	1	72	METS
2	66	0	0	46	METS
1	70	0	1	106	METS
35	42	0	1	71	METS
9	61	0	0	76	METS
0	69	0	1	66	METS
6	74	0	1	87	METS
16	63	0	1	68	METS
18	54	0	0	73	METS
1	57	0	1	75	METS
6	68	0	1	72	METS
25	45	1	1	79	METS
15	66	0	1	61	METS
22	67	0	1	81	METS
5	61	0	1	98	METS
16	57	1	1	74	METS
25	50	1	1	82	METS
4	67	0	1	71	METS
20	68	0	1	75	METS
13	63	1	1	88	METS
2	72	0	1	57	METS
18	65	0	1	64	METS
12	43	0	0	105	METS
3	79	1	1	59	METS
18	59	0	0	70	METS
7	54	0	1	86	METS
11	40	0	0	80	METS
12	64	0	1	109	METS
12	79	0	0	77	METS
8	86	1	1	64	METS
5	78	1	1	60	METS
12	71	0	1	73	METS
5	52	0	1	94	METS
9	63	0	1	83	METS
25	64	0	0	66	METS
19	68	0	0	66	METS
34	49	0	0	82	METS
16	74	0	1	115	METS
1	58	0	1	76	METS
4	80	1	1	94	METS
29	53	0	0	81	METS
21	55	0	1	70	METS
2	63	0	1	92	METS
27	63	0	1	67	METS
36	49	0	1	78	METS
2	54	1	1	116	METS
8	76	1	1	87	METS
22	56	1	1	70	METS
8	77	0	1	86	METS
24	58	0	0	86	METS
35	56	0	0	77	METS
2	59	0	1	96	METS
18	54	0	0	97	METS
22	41	1	1	70	METS
21	58	0	0	63	METS
11	59	1	1	104	METS
28	46	1	1	63	METS
8	92	0	0	56	METS
30	59	0	0	83	METS
9	77	0	1	95	METS
16	42	0	0	84	METS
37	54	0	1	60	METS
10	71	0	0	80	METS
14	70	0	1	70	METS
3	65	0	0	95	METS
20	67	0	0	71	METS
13	67	0	0	66	METS
5	82	0	1	101	METS
25	41	1	1	93	METS
9	75	1	1	69	METS
19	53	0	1	81	METS
15	67	0	1	90	METS
0	70	0	0	76	METS
89	80	0	1	62	METS
26	45	1	1	72	METS
-1	79	1	1	62	METS
13	63	0	0	63	METS
8	65	0	1	66	METS
27	45	0	0	83	METS
13	64	0	1	84	METS
21	66	0	0	60	METS
23	67	0	1	57	METS
14	70	0	1	79	METS
13	70	0	1	72	METS
5	47	0	1	101	METS
22	43	0	0	84	METS
-7	61	1	1	70	METS
10	57	1	1	127	METS
18	42	0	0	96	METS
22	53	1	1	73	METS
15	57	0	0	67	METS
17	69	0	0	75	METS
7	58	0	1	95	METS
18	56	0	0	89	METS
3	67	0	1	60	METS
23	68	0	1	59	METS
-2	74	0	0	105	METS
28	61	1	1	65	METS
12	47	0	0	95	METS
13	50	0	0	91	METS
5	72	0	1	97	METS
49	55	0	0	67	METS
10	50	0	0	65	METS
13	44	0	0	78	METS
10	52	1	1	90	METS
-7	56	0	1	83	METS
21	69	1	1	68	METS
5	68	0	0	74	METS
0	63	1	1	81	METS
22	69	1	1	81	METS
-10	69	0	1	75	METS
6	45	0	1	86	METS
-42	70	0	1	89	METS
21	50	0	1	60	METS
22	74	0	0	67	METS
25	74	0	1	79	METS
18	67	0	1	69	METS
0	58	0	1	88	METS
3	48	1	1	107	METS
19	61	0	1	79	METS
25	62	0	1	80	METS
20	41	1	1	73	METS
18	70	0	1	77	METS
10	64	0	1	78	METS
8	66	0	1	60	METS
9	62	0	1	85	METS
18	55	0	0	67	METS
27	57	0	1	80	METS
26	63	0	1	73	METS
19	61	1	1	81	METS
30	57	0	1	86	METS
25	60	0	1	75	METS
23	63	0	1	87	METS
58	53	0	1		METS
16	76	0	1	71	METS
-17	54	0	1	72	METS
18	66	1	1	103	METS
7	67	0	1	87	METS
19	47	1	1	99	METS
14	60	0	1	72	METS
16	56	0	1	68	METS
24	73	0	1	77	METS
22	65	1	1	66	METS
16	49	1	1	78	METS
6	71	0	1	73	METS
19	61	0	1	50	METS
30	61	0	1	68	METS
-11	73	0	1	70	METS
9	75	1	1	81	METS
26	43	1	1	66	METS
9	58	1	1	77	METS
21	64	0	1	74	METS
25	66	1	1	74	METS
11	61	1	1	136	METS
9	69	1	1	74	METS
21	65	1	1	62	METS
23	52	1	1	59	METS
14	62	0	1	75	METS
8	50	1	1	112	METS
18	61	0	1	93	METS
18	52	0	1	93	METS
34	57	1	1	90	METS
8	80	1	1	92	METS
5	76	0	1	78	METS
4	51	0	1	78	METS
18	67	1	1	52	METS
3	86	0	1	78	METS
-19	58	1	1	80	METS
12	78	0	1	82	METS
-3	69	0	1	103	METS
39	68	0	1	74	METS
15	57	1	1	82	METS
33	52	0	1	72	METS
18	61	1	1	67	METS
-28	54	0	1	96	METS
8	61	1	1	80	METS
14	49	0	1	84	METS
4	68	1	1	78	METS
15	74	0	0	73	METS
14	49	0	1	89	METS
6	66	1	1	87	METS
7	60	1	1	96	METS
8	44	1	1	104	METS
16	41	0	1	67	METS
11	67	1	1	75	METS
16	59	1	1	84	METS
19	54	0	1	86	METS
13	50	1	1	72	METS
5	64	0	0	74	METS
13	56	1	1	100	METS
21	67	1	1	74	METS
13	60	1	1	60	METS
2	61	0	1	81	METS
20	69	0	1	57	METS
-6	66	0	1	123	METS
6	78	1	1	81	METS
12	68	1	1	87	METS
24	53	1	1	80	METS
10	74	1	1	66	METS
7	61	0	0	72	METS
8	51	0	1	78	METS
35	56	0	1	66	METS
43	71	1	1	78	METS
7	65	1	1	96	METS
2	75	1	1	76	METS
12	56	1	1	74	METS
8	78	1	1	80	METS
10	75	0	1	94	METS
18	58	0	1	68	METS
10	75	1	1	80	METS
26	52	1	1	72	METS
19	62	0	0	97	METS
-22	60	1	1	84	METS
-23	65	0	0	93	METS
-5	63	0	0	92	METS
11	62	0	0	72	METS
15	52	0	0	96	METS
30	49	0	0	89	METS
6	61	0	0	103	METS
17	54	0	0	63	METS
14	65	0	0	81	METS
-3	66	0	0	55	METS
2	66	0	0	88	METS
18	66	0	0	80	METS
8	54	0	0	80	METS
40	68	0	1	68	METS
3	61	0	0	100	METS
6	70	0	0	83	METS
47	65	0	1	61	METS
8	71	0	1	99	METS
11	57	0	0	83	METS
8	57	1	1	75	METS
19	60	0	0	58	METS
12	54	1	1	83	METS
11	67	1	1	83	METS
24	63	1	1	69	METS
6	63	1	1	62	METS
12	62	1	1	95	METS
32	58	0	0	77	METS
28	66	0	1	60	METS
23	52	0	1	93	METS
32	53	0	1	61	METS
30	52	0	0	74	METS
8	77	1	1	85	METS
14	64	0	0	83	METS
28	63	0	0	154	METS
27	58	0	0	65	METS
24	59	0	0	77	METS
21	70	0	0	85	METS
16	67	0	0	83	METS
24	55	0	0	92	METS
14	58	0	0	105	METS
17	60	0	0	91	METS
31	50	0	0	66	METS
19	50	0	0	85	METS
21	63	1	1	64	METS
21	70	1	1	85	METS
12	69	0	1	70	METS
10	50	1	1	87	METS
19	72	1	1	80	METS
2	53	1	1	94	METS
8	70	0	0	105	METS
2	64	1	1	95	METS
35	56	0	1	60	METS
25	52	0	0	60	METS
38	56	1	1	81	METS
11	55	0	0	85	METS
19	55	0	0	73	METS
12	66	0	0	77	METS
20	74	0	0	64	METS
27	60	0	0	74	METS
44	80	0	1	65	METS
0	57	0	1	90	METS
15	56	0	1	109	METS
10	52	0	0	88	METS
10	56	0	0	113	METS
23	64	0	1	61	METS
16	72	0	1	77	METS
1	68	0	0	79	METS
28	63	1	1	85	METS
27	64	0	0	62	METS
14	58	0	0	75	METS
23	50	0	0	84	METS
8	69	0	0	85	METS
16	66	0	0	75	METS
13	72	0	0	92	METS
26	50	0	0	60	METS
13	49	0	0	94	METS
12	73	0	0	65	METS
16	60	0	0	67	METS
14	60	0	0	80	METS
11	69	0	0	84	METS
8	71	0	0	71	METS
14	56	0	0	75	METS
19	52	0	0	71	METS
6	58	1	1	114	METS
19	57	0	0	87	METS
19	65	1	1	82	POMHR
-6	60	1	1	113	POMHR
11	62	1	1	87	POMHR
36	60	0	0	67	POMHR
18	69	1	1	75	POMHR
15	72	1	1	97	POMHR
-19	59	1	1	97	POMHR
4	64	0	1	102	POMHR
0	78	1	1	97	POMHR
10	75	1	1	76	POMHR
0	76	1	1	81	POMHR
64	66	1	1	84	POMHR
0	88	1	1	73	POMHR
19	61	1	1	89	POMHR
26	58	0	1	72	POMHR
21	66	1	1	91	POMHR
2	65	0	1	69	POMHR
32	68	0	1	66	POMHR
26	52	1	1	72	POMHR
24	51	1	1	95	POMHR
19	61	1	1	95	POMHR
10	83	1	1	85	POMHR
15	78	1	1	92	POMHR
9	74	1	1	87	POMHR
15	63	0	1	79	POMHR
16	70	1	1	94	POMHR
33	48	1	1	92	POMHR
16	64	0	1	117	POMHR
27	75	1	1	86	POMHR
40	55	1	1	81	POMHR
12	59	1	1	93	POMHR
12	71	0	1	84	POMHR
11	52	1	1	85	POMHR
8	67	1	1	104	POMHR
20	53	1	1	78	POMHR
-3	57	0	1	90	POMHR
39	62	1	1	59	POMHR
26	73	1	1	71	POMHR
18	64	1	1	90	POMHR
17	70	1	1	79	POMHR
16	47	0	1	76	POMHR
3	69	1	1	95	POMHR
22	55	1	1	76	POMHR
31	53	1	1	87	POMHR
23	71	1	1	83	POMHR
33	62	0	1	76	POMHR
0	59	1	1	72	POMHR
28	48	1	1	59	POMHR
11	65	1	1	86	POMHR
3	67	0	1	93	POMHR
4	66	1	1	88	POMHR
10	81	1	1	91	POMHR
22	55	1	1	72	POMHR
11	73	1	1	69	POMHR
20	56	0	1	80	POMHR
13	37	1	1	86	POMHR
24	62	0	1	81	POMHR
7	74	1	1	100	POMHR
25	52	1	1	69	POMHR
18	52	1	1	69	POMHR
10	64	0	1	83	POMHR
15	49	1	1	90	POMHR
10	66	1	1	81	POMHR
11	71	1	1	93	POMHR
31	71	1	1	73	POMHR
12	76	1	1	72	POMHR
4	66	1	1	68	POMHR
12	74	1	1	74	POMHR
17	57	1	1	70	POMHR
8	77	1	1	65	POMHR
22	67	1	1	72	POMHR
20	79	1	1	62	POMHR
29	63	1	1	85	POMHR
15	51	1	1	92	POMHR
21	48	0	1	80	POMHR
15	67	0	0	76	METS
19	78	1	1	73	METS
14	60	1	1	77	METS
23	81	0	0	75	METS
-2	66	0	0	75	METS
16	73	0	1	73	METS
6	74	1	1	65	METS
20	84	0	0	72	METS
13	84	0	1	83	METS
7	73	0	0	84	METS
8	61	0	1	92	METS
25	64	0	1	69	METS
7	67	0	1	107	METS
15	54	1	1	81	METS
-3	64	1	1	103	METS
17	79	0	1	66	METS
5	53	1	1	88	METS
7	67	0	0	71	METS
5	79	0	1	62	METS
19	63	0	1	73	METS
25	66	1	1	71	METS
14	68	0	1	70	METS
18	69	0	1	53	METS
10	85	0	1	71	METS
8	69	1	1	61	METS
41	61	0	1	73	METS
14	56	0	0	69	METS
27	78	0	1	60	METS
37	73	1	1	63	METS
11	54	0	1	85	METS
5	70	0	0	73	METS
17	81	0	1	73	METS
13	74	0	0	69	METS
15	60	0	1	59	METS
11	60	0	0	98	METS
12	75	0	0	68	METS
7	72	1	1	83	METS
10	68	0	1	92	METS
11	81	0	1	103	METS
28	72	0	1	53	METS
9	76	0	1	69	METS
12	76	1	1	72	METS
7	63	0	1	103	METS
13	73	0	0	43	METS
6	72	1	1	82	METS
28	56	0	0	88	METS
16	62	0	0	93	METS
7	62	0	1	73	METS
22	70	0	1	60	METS
24	69	0	1	74	METS
38	66	1	1	50	METS
16	54	0	1	77	METS
13	70	0	0	85	METS
8	56	0	1	84	METS
4	67	0	1	86	METS
19	67	0	1	66	METS
18	71	0	1	71	METS
12	56	0	0	92	METS
18	70	0	0	59	METS
19	78	0	1	85	METS
34	56	0	1	64	METS
34	71	0	0	59	METS
30	72	1	1	88	METS
13	64	0	1	50	METS
9	68	0	1	105	METS
3	75	1	1	66	METS
20	74	0	0	81	METS
10	68	1	1	63	METS
40	64	0	1	55	METS
3	76	0	1	67	METS
6	57	0	1	69	METS
10	74	0	0	54	METS
29	68	0	1	79	METS
38	66	0	1	67	METS
12	70	0	0	65	METS
20	56	1	1	81	METS
19	67	1	1	67	METS
15	88	1	1	68	METS
20	58	0	1	70	METS
15	76	1	1	71	METS
23	74	0	1	73	METS
12	69	1	1	73	METS
25	61	0	0	64	METS
21	78	0	1	83	METS
19	53	0	0	76	METS
2	64	0	0	90	METS
14	46	0	0	87	METS
20	73	0	0	63	METS
12	76	0	0	67	METS
19	59	0	0	94	METS
23	52	0	0	71	METS
5	60	0	1	74	METS
-15	73	0	0	68	METS
22	66	1	1	69	METS
20	53	0	0	68	METS
7	47	0	0	72	METS
24	47	0	0	65	METS
22	72	1	1	77	METS
15	61	0	0	70	METS
9	87	0	0	70	METS
9	64	0	0	86	METS
9	75	0	0	125	METS
18	45	0	0	72	METS
8	80	0	0	75	METS
1	79	0	0	75	METS
18	70	0	1	68	METS
20	53	0	1	96	METS
22	61	0	0	88	METS
38	73	0	0	107	METS
7	71	0	0	80	METS
21	42	0	0	72	METS
9	68	1	1	87	METS
18	65	0	0	66	METS
9	74	0	0	55	METS
20	42	0	0	77	METS
25	47	0	0	80	METS
21	63	0	1	65	METS
17	60	0	0	80	METS
29	66	0	1	69	METS
-18	45	0	0	80	METS
23	65	0	0	67	METS
25	65	0	1	75	METS
5	63	0	0	95	METS
12	69	1	1	70	METS
10	72	1	1	68	METS
26	51	0	1	75	METS
11	52	0	1	83	METS
14	65	0	0	60	METS
9	45	0	0	93	METS
11	57	0	0	65	METS
23	65	0	1	93	METS
9	78	1	1	73	METS
13	62	0	1	70	METS
13	82	0	1	65	METS
14	49	0	0	71	METS
37	68	0	1	58	METS
6	69	0	0	59	METS
11	68	0	1	98	METS
15	73	0	1	99	METS
46	76	0	0	52	METS
14	72	1	1	60	METS
2	66	0	0	90	METS
22	53	0	0	83	METS
2	66	0	1	84	METS
14	66	0	1	60	METS
19	58	0	1	71	METS
21	73	0	0	82	METS
10	64	0	1	57	METS
15	60	0	0	85	METS
18	62	0	0	49	METS
7	65	0	0	81	METS
17	65	0	1	66	METS
20	70	0	1	54	METS
7	79	1	1	72	METS
0	52	0	0	71	METS
-6	63	0	1	118	METS
10	63	1	1	83	METS
25	64	0	1	100	METS
-1	60	0	1	117	METS
4	73	0	1	57	METS
20	75	0	0	68	METS
0	65	0	0	76	METS
0	67	0	0	142	METS
0	80	0	0	80	METS
12	42	0	0	75	METS
12	81	0	1	64	METS
14	60	0	1	92	METS
16	59	0	0	103	METS
12	76	0	0	75	METS
12	62	0	1	96	METS
-9	64	0	1	80	METS
5	67	0	1	84	METS
13	67	0	1	75	METS
14	58	0	1	62	METS
9	77	1	1	86	METS
-6	49	1	1	80	METS
0	80	0	0	68	METS
10	62	0	1	91	METS
18	76	0	1	63	METS
19	67	0	1	65	METS
16	73	0	1	57	METS
9	65	0	0	98	METS
8	84	0	1	70	METS
0	65	0	1	76	METS
25	68	0	0	66	METS
26	42	0	0	66	METS
32	79	1	1	66	METS
11	65	0	1	96	METS
25	59	0	0	48	METS
25	51	0	1	85	METS
2	58	0	0	99	METS
3	74	0	0	79	METS
-22	67	0	0	76	METS
-22	57	0	0	70	METS
13	60	0	1	83	METS
6	74	0	0	60	METS
0	80	0	1	53	METS
29	71	0	0	93	METS
24	67	0	0	61	METS
31	52	0	1	62	METS
44	82	1	1	75	METS
18	65	0	1	58	METS
27	55	0	0	105	METS
46	52	0	0	68	METS
14	69	0	0	105	METS
18	64	0	0	53	METS
53	50	0	1	54	METS
-13	72	0	1	63	METS
8	50	0	1	98	METS
31	72	1	1	72	METS
33	68	0	0	75	METS
54	73	0	0	73	METS
40	59	0	0	60	METS
9	52	0	0	72	METS
23	53	0	0	74	METS
21	73	0	0	68	METS
13	83	0	1	71	METS
5	64	0	0	105	METS
8	46	1	1	105	METS
14	57	0	1	74	METS
21	76	0	0	61	METS
14	74	0	0	88	METS
5	67	0	0	69	METS
18	62	1	1	65	METS
22	80	0	0	60	METS
18	67	0	0	80	METS
23	61	0	1	70	METS
12	67	0	0	87	METS
17	59	0	0	108	METS
18	50	0	1	108	METS
29	48	0	1	76	METS
6	52	0	1	87	METS
32	74	0	1	70	METS
17	57	0	0	98	METS
28	56	0	0	111	METS
26	57	0	0	84	METS
29	70	0	0	78	METS
30	72	0	1	63	METS
24	62	0	0	61	METS
-28	83	0	0	83	METS
2	77	1	1	50	METS
20	59	0	0	95	METS
3	51	0	1	121	METS
15	69	0	0	115	METS
10	63	0	0	101	METS
0	50	0	0	61	METS
21	75	0	0	81	METS
10	71	0	1	75	METS
5	70	0	1	75	METS
0	76	0	1	77	METS
0	75	0	1	81	METS
7	70	0	0	86	METS
6	71	1	1	68	METS
8	78	0	1	55	METS
6	51	0	1	77	METS
10	67	0	1	74	METS
11	75	0	1	100	METS
14	71	0	0	88	METS
-1	68	0	0	69	METS
3	70	0	0	77	METS
6	67	0	1	87	METS
16	70	0	0	90	METS
13	71	0	1	66	METS
31	72	0	0	50	METS
15	68	0	1	88	METS
16	87	0	1	77	METS
19	48	1	1	71	METS
26	61	1	1	64	METS
-28	76	0	1	66	METS
14	65	0	1	75	METS
29	61	0	1	79	METS
65	60	1	1	61	METS
30	74	0	1	57	METS
21	80	0	0	76	METS
12	83	1	1	98	METS
20	76	1	1	58	METS
24	63	1	1	64	METS
21	55	0	0	71	METS
12	69	1	1	74	METS
9	67	1	1	68	METS
7	62	0	1	90	METS
15	84	0	0	70	METS
6	65	0	0	84	METS
16	77	0	0	76	METS
14	60	0	0	77	METS
7	48	0	0	79	METS
7	67	0	0	91	METS
5	61	0	1	84	METS
11	75	0	0	85	METS
20	45	1	1	56	METS
5	74	0	1	62	METS
19	41	0	1	78	METS
25	67	0	1	62	METS
6	75	0	0	55	METS
12	72	1	1	85	METS
4	65	0	0	69	METS
7	65	0	0	62	METS
17	77	0	1	77	METS
25	57	0	0	74	METS
6	57	0	0	70	METS
18	60	0	0	79	METS
15	60	0	1	80	METS
10	67	0	1	85	METS
15	62	0	1	63	METS
16	73	0	0	101	METS
26	48	0	0	72	METS
11	64	1	1	91	METS
12	64	0	0	81	METS
4	75	0	1	78	METS
7	84	0	0	55	METS
20	60	0	0	78	METS
14	54	1	1	91	METS
11	74	1	1	72	METS
20	48	0	0	65	METS
15	62	0	1	68	METS
19	64	0	1	88	METS
8	67	0	0	75	METS
6	80	0	1	82	METS
6	80	1	1	69	METS
26	68	1	1	68	METS
17	81	0	1	75	METS
21	43	1	1	86	METS
20	67	0	0	72	METS
4	71	1	1	105	METS
25	77	0	0	75	METS
14	74	0	0	85	METS
36	71	0	1	80	METS
14	63	0	0	70	METS
26	60	0	0	60	METS
7	53	0	1	77	METS
17	66	1	1	79	METS
8	65	1	1	75	METS
15	54	1	1	84	METS
22	69	0	0	75	METS
8	70	1	1	85	METS
13	65	0	1	75	METS
11	89	1	1	53	METS
8	73	1	1	95	METS
21	63	0	1	100	METS
-16	64	1	1	84	METS
27	48	0	1	106	METS
9	76	1	1	76	METS
21	74	0	1	88	METS
23	65	0	1	77	METS
19	70	1	1	85	METS
5	70	0	0	72	METS
9	70	0	0	76	METS
6	68	0	0	79	METS
-33	59	1	1	70	METS
-1	75	0	1	91	METS
22	56	0	0	75	METS
24	63	0	0	77	METS
-1	59	0	1	83	METS
24	69	0	0	79	METS
2	60	1	1	71	METS
2	85	0	1	82	METS
19	64	0	1	63	METS
21	55	0	0	63	METS
17	72	0	0	46	METS
0	52	0	1	73	METS
24	73	0	0	69	METS
6	59	1	1	67	METS
6	69	1	1	80	METS
15	42	0	1	80	METS
14	53	0	0	70	METS
-17	70	0	1	81	METS
10	64	0	1	74	METS
-9	63	0	1	58	METS
29	63	0	1	71	METS
17	72	0	1	73	METS
20	55	0	0	64	METS
19	62	0	0	67	METS
14	62	0	0	88	METS
-19	61	0	1	68	METS
6	42	0	1	92	METS
13	67	1	1	91	METS
11	73	0	1	58	METS
21	53	1	1	88	METS
37	54	0	1	67	METS
15	69	1	1	84	METS
25	62	1	1	54	METS
-42	72	0	1	60	METS
27	57	0	1	61	METS
25	68	1	1	91	POMHR
0	74	0	1	79	POMHR
23	74	0	1	55	POMHR
23	76	1	1	81	POMHR
9	47	1	1	84	POMHR
17	80	0	1	62	POMHR
21	78	0	1	66	POMHR
16	70	0	0	81	POMHR
18	63	1	1	88	POMHR
25	74	1	1	80	POMHR
14	82	1	1	63	POMHR
14	50	1	1	83	POMHR
36	63	1	1	36	POMHR
16	81	1	1	80	POMHR
16	61	1	1	72	POMHR
17	78	0	1	100	POMHR
16	59	1	1	82	POMHR
28	85	0	1	61	POMHR
22	74	1	1	66	POMHR
12	78	0	1	68	POMHR
19	77	0	0	77	POMHR
37	62	1	1	55	POMHR
11	81	0	1	56	POMHR
23	63	1	1	80	POMHR
21	67	1	1	67	POMHR
5	61	1	1	93	POMHR
6	66	0	1	106	POMHR
22	65	0	0	85	POMHR
17	76	0	0	76	POMHR
3	62	0	1	83	POMHR
8	85	0	1	53	POMHR
11	71	0	1	57	POMHR
19	60	0	1	66	POMHR
31	74	1	1	64	POMHR
11	62	1	1	64	POMHR
26	67	0	1	67	POMHR
23	56	1	1	88	POMHR
15	65	1	1	86	POMHR
20	68	0	1	61	POMHR
1	65	0	0	72	POMHR
15	52	0	1	60	POMHR
13	85	0	1	68	POMHR
3	68	0	1	90	POMHR
21	66	1	0	62	POMHR
17	79	0	1	81	POMHR
22	66	0	1	76	POMHR
16	83	0	1	78	POMHR
14	61	1	1	76	POMHR
12	74	0	1	83	POMHR
2	65	0	1	114	POMHR
8		0	1	84	POMHR
-5	85	1	1	97	POMHR
7	74	1	1	95	POMHR
29	69	0	1	71	POMHR
6	77	1	1	108	POMHR
14	68	0	0	81	POMHR
10	69	1	1	93	POMHR
13	82	1	1	91	POMHR
42	70	1	1	74	POMHR
28	80	1	1	82	POMHR
28	66	1	1	75	POMHR
19	46	1	1	79	POMHR
15	76	1	1	89	POMHR
15	55	1	1	58	POMHR
1	73	0	1	82	POMHR
12	83	0	1	108	POMHR
24	67	0	1	60	POMHR
7	63	1	1	83	POMHR
19	63	1	1	72	POMHR
26	50	0	1	71	POMHR
7	75	1	1	96	POMHR
10	66	0	1	88	POMHR
-1	52	0	1	111	POMHR
12	66	1	1	69	POMHR
9	68	0	1	90	POMHR
17	66	1	1	70	POMHR
26	66	1	1	76	POMHR
30	57	0	1	68	POMHR
15	71	0	1	82	POMHR
4	69	0	1	u0able to see- too blurred	POMHR
41	61	0	1	82	POMHR
4	67	0	1	86	POMHR
18	41	0	0	91	POMHR
10	61	0	1	92	POMHR
18	75	1	1	106	POMHR
11	65	1	1	61	POMHR
14	68	0	1	94	POMHR
34	49	1	1	102	POMHR
18	33	0	1	75	POMHR
12	44	1	1	98	POMHR
25	84	1	1	56	POMHR
12	81	0	1	106	POMHR
17	47	1	1	66	POMHR
19	57	0	1	87	POMHR
19	75	1	1	69	POMHR
35	71	0	1	61	POMHR
25	49	0	1	93	POMHR
5	90	0	1	104	POMHR
23	34	0	0	98	POMHR
11	77	0	1	66	POMHR
18	65	1	1	73	POMHR
20	74	1	1	121	POMHR
9	78	1	1	86	POMHR
8	83	1	1	85	POMHR
-19	83	1	1	105	POMHR
20	63	0	1	89	POMHR
25	56	0	1	63	POMHR
13	61	0	1	78	POMHR
22	77	1	1	84	POMHR
-13	75	0	1	81	POMHR
14	77	0	1	72	POMHR
6	78	0	1	58	POMHR
6	72	1	1	100	POMHR
10	80	1	1	68	POMHR
24	63	1	1	75	POMHR
31	64	0	1	77	POMHR
13	72	1	1	85	POMHR
9	71	1	1	98	POMHR
30	84	0	1	94	POMHR
13	76	0	1	81	POMHR
24	65	1	1	74	POMHR
6	82	0	1	85	POMHR
21	73	1	1	98	POMHR
-12	67	0	0	71	POMHR
12	71	1	1	59	POMHR
-1	82	1	1	72	POMHR
9	58	1	1	89	POMHR
15	70	0	1	68	POMHR
5	68	1	1	87	POMHR
25	88	0	0	72	POMHR
8	80	0	1	74	POMHR
4	82	1	1	74	POMHR
12	73	1	1	66	POMHR
8	82	0	1	49	POMHR
17	76	0	1	68	METS
16	71	0	0	62	METS
8	49	0	0	80	METS
43	46	0	1	80	METS
11	76	0	1	47	METS
9	61	0	1	98	METS
19	49	0	1	89	METS
0	67	0	1	100	METS
10	71	0	1	64	METS
18	65	0	1	80	METS
29	73	0	0	57	METS
4	66	1	1	59	METS
-1	60	0	0	82	METS
0	54	0	1	83	METS
23	53	0	0	86	METS
5	74	0	1	57	METS
15	64	0	1	65	METS
55	52	0	0	76	METS
18	81	0	0	51	METS
10	80	0	0	78	METS
16	47	0	0	101	METS
19	84	0	1	66	METS
30	72	0	1	81	METS
15	74	0	0	59	METS
23	56	0	0	60	METS
-1	76	0	1	102	METS
35	76	0	0	57	METS
16	73	0	0	60	METS
5	82	0	0	90	METS
7	70	0	0	93	METS
2	72	0	0	83	METS
8	74	0	0	67	METS
10	84	0	1	72	METS
24	60	0	0	73	METS
29	75	0	0	65	METS
25	72	0	0	60	METS
15	78	0	0	68	METS
26	73	0	0	60	METS
6	56	0	0	69	METS
10	78	0	0	81	METS
12	82	0	0	102	METS
19	70	0	0	64	METS
37	77	0	0	54	METS
16	57	0	0	74	METS
7	68	0	0	97	METS
4	80	0	1	68	METS
8	57	0	0	76	METS
28	66	0	0	64	METS
26	60	0	0	81	METS
22	78	0	0	79	METS
37	59	0	0	80	METS
15	72	0	0	81	METS
23	70	0	0	59	METS
14	68	0	1	78	METS
15	57	0	1	66	METS
23	82	0	1	68	METS
-1	80	0	0	65	METS
10	58	0	0	89	METS
19	48	0	1	83	METS
2	78	1	1	52	METS
1	69	0	0	132	METS
40	47	0	1	61	METS
37	52	0	1	83	METS
25	66	0	0	69	METS
9	53	0	0	101	METS
30	66	0	1	75	METS
18	51	0	0	67	METS
19	44	0	0	66	METS
2	72	0	1	97	METS
5	67	0	1	107	METS
18	66	0	0	90	METS
18	77	0	0	72	METS
14	47	0	1	59	METS
32	72	0	1	71	METS
17	57	0	0	68	METS
23	58	0	0	85	METS
6	56	1	1	92	METS
-12	55	1	1	65	POMHR
10	54	0	1	104	POMHR
23	66	0	1	57	POMHR
28	78	1	1	87	POMHR
10	64	0	1	64	POMHR
13	63	1	1	81	POMHR
41	63	0	1	68	POMHR
5	77	0	1	85	POMHR
7	76	1	1	53	POMHR
13	73	0	1	81	POMHR
12	51	1	1	52	METS
8	80	0	1	84	METS
14	73	0	1	64	METS
8	66	0	1	97	METS
22	66	0	1	66	METS
-3	62	0	1	72	METS
68	74	0	0	59	METS
20	68	0	0	88	METS
10	50	0	0	73	METS
5	74	0	0	62	METS
19	62	0	1	56	METS
20	71	0	0	54	METS
19	74	0	0	47	METS
7	44	1	1	77	METS
14	72	0	0	68	METS
5	71	0	0	89	METS
16	58	0	1	91	METS
16	81	0	0	69	METS
7	61	0	0	92	METS
14	74	0	1	65	METS
21	68	0	1	62	METS
-2	66	1	1	71	METS
-23	76	0	0	81	METS
2	79	0	0	63	METS
13	63	0	1	75	METS
5	67	1	1	82	METS
14	62	1	1	77	METS
10	71	0	0	60	METS
22	63	1	1	86	METS
13	70	0	0	64	METS
19	58	1	1	67	METS
3	70	1	1	73	METS
11	47	0	0	99	METS
17	82	0	0	81	METS
32	74	0	0	82	METS
18	71	0	0	44	METS
6	64	1	1	62	METS
16	51	0	1	67	METS
16	47	0	0	93	METS
20	49	0	0	84	METS
16	41	0	0	87	METS
22	70	0	1	65	METS
7	62	0	1	70	METS
19	64	0	0	76	METS
21	61	0	0	70	METS
25	53	0	0	72	METS
17	50	0	0	77	METS
6	79	0	0	59	METS
7	40	0	0	75	METS
18	55	0	1	67	METS
20	57	0	0	73	METS
24	49	1	1	71	METS
24	65	0	1	74	METS
14	75	0	0	72	METS
12	57	1	1	82	METS
21	54	1	1	94	METS
21	78	0	1	61	METS
11	69	0	1	84	METS
8	70	0	0	85	METS
-14	47	0	1	82	METS
3	52	0	1	72	METS
13	60	0	1	94	METS
2	59	0	0	106	METS
65	83	0	0	84	METS
16	62	0	0	78	METS
4	64	0	0	73	METS
0	72	0	0	79	METS
18	72	0	1	70	METS
20	47	0	1	112	METS
8	61	0	0	71	METS
42	76	0	1	76	METS
11	69	0	0	70	METS
11	60	1	1	84	METS
14	85	1	1	80	METS
35	72	0	0	63	METS
16	67	0	0	88	METS
10	54	0	1	78	METS
13	62	0	0	74	METS
22	46	0	0	75	METS
8	70	0	1	87	METS
34	73	1	1	56	METS
7	67	0	0	75	METS
12	79	0	0	65	METS
19	70	0	1	60	METS
12	68	0	1	96	METS
24	54	1	1	84	METS
-49	81	0	1	61	METS
7	79	0	1	80	METS
14	80	0	1	84	METS
11	51	0	0	87	METS
23	69	0	0	47	METS
21	61	0	1	90	METS
20	50	0	0	86	METS
5	50	0	0	76	METS
18	68	0	0	77	METS
26	48	0	0	70	METS
11	76	0	1	72	METS
17	65	0	0	81	METS
10	83	1	1	82	METS
14	66	0	0	87	METS
1	81	0	1	88	METS
10	77	0	0	64	METS
11	76	0	0	58	METS
13	57	0	0	68	METS
14	60	1	1	91	METS
21	70	1	1	81	METS
7	84	0	0	111	METS
15	65	0	0	68	METS
32	61	0	1	73	METS
19	59	0	0	70	METS
6	68	0	0	63	METS
24	74	1	1	100	METS
17	67	0	0	65	METS
13	71	0	0	76	METS
12	64	0	0	74	METS
26	55	1	1	82	METS
40	65	0	1	55	METS
13	61	1	1	93	METS
46	46	1	1	65	METS
26	63	1	1	67	METS
22	66	0	1	70	METS
9	74	0	0	69	METS
25	79	0	1	58	METS
16	70	0	0	88	METS
-1	67	0	1	85	METS
21	70	0	0	79	METS
16	42	1	1	88	METS
11	71	0	0	66	METS
7	76	1	1	58	METS
23	61	0	0	64	METS
13	66	0	0	70	METS
14	77	0	0	67	METS
21	53	1	1	89	METS
17	72	0	0	68	METS
15	56	0	1	83	METS
23	65	0	1	79	METS
11	57	0	0	87	METS
8	73	0	1	94	METS
19	66	1	1	106	POMHR
9	68	0	1	81	METS
10	58	0	1	100	METS
8	70	1	1	77	POMHR
5	81	1	1	105	METS
6	69	0	0	105	METS
19	68	0	0	68	METS
13	56	0	1	88	METS
